# Supplementary material for: Hydrogen Sulfide Attenuates Hydrogen Peroxide-Induced Injury in Human Lung Epithelial A549 Cells
Source: MDPI journal article supplement (doi:10.3390/ijms20163975), 2019-08-15
Supplement: s1 [file s1]

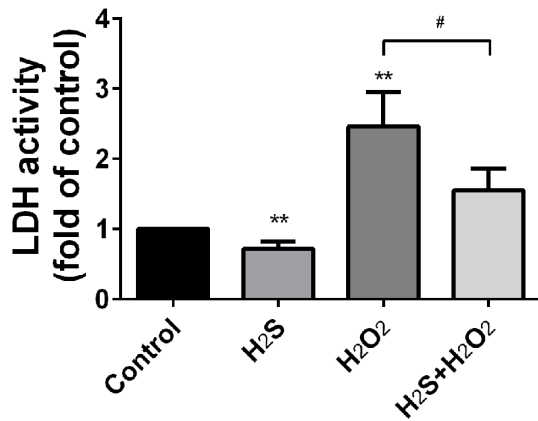

**Figure S1.** H<sub>2</sub>O<sub>2</sub> increased LDH release in A549 cells.

The enzymatic activity of lactate dehydrogenase (LDH) in serum-free medium were measured. The experiments were repeated at least three times. The results are presented as the mean  $\pm$  SD. (\*\* $P < 0.01$  vs. control group; # $P < 0.05$  H<sub>2</sub>O<sub>2</sub> group vs. H<sub>2</sub>S+H<sub>2</sub>O<sub>2</sub> group).
